## Correction: Identification of neoepitopes recognized by tumor-infiltrating lymphocytes (TILs) from patients with glioma

**Davide Valentini<sup>1</sup>, Martin Rao<sup>2</sup>, Qingda Meng<sup>2</sup>, Anna von Landenberg<sup>2</sup>, Jiri Bartek Jr<sup>3,4</sup>, Georges Sinclair<sup>4</sup>, Georgia Paraschoudi<sup>2</sup>, Elke Jäger<sup>5</sup>, Inti Harvey-Peredo<sup>4</sup>, Ernest Dodoo<sup>4</sup> and Markus Maeurer<sup>1,2,5</sup>**

<sup>1</sup> Centre for Allogeneic Stem Cell Transplantation (CAST), Karolinska University Hospital Huddinge, Stockholm, Sweden

<sup>2</sup> Therapeutic Immunology Unit (TIM), Department of Laboratory Medicine (LABMED), Karolinska Institutet, Stockholm, Sweden

<sup>3</sup> Department of Neurosurgery, Copenhagen University Hospital Rigshospitalet, Copenhagen, Denmark

<sup>4</sup> Department of Neurosurgery, Karolinska University Hospital, Stockholm, Sweden

<sup>5</sup> Krankenhaus Nordwest, Division of Oncology and Hematology, Frankfurt, Germany

**Published:** December 04, 2018

**Copyright:** Valentini et al. This is an open-access article distributed under the terms of the Creative Commons Attribution License 3.0 (CC BY 3.0), which permits unrestricted use, distribution, and reproduction in any medium, provided the original author and source are credited.

**This article has been corrected:** Please note the following IP filing: IP has been filed for the cytokine cocktail IL-2, IL-15 and IL-21 used for T-cell expansion.

Original article: Oncotarget. 2018; 9:19469-19480. <https://doi.org/10.18632/oncotarget.24955>
